## The *HAC1* Histone Acetyltransferase Promotes Leaf Senescence via Regulation of *ERF022*

Authors: Hinckley, Will E.<sup>1,2</sup>, Keymanesh, Keykhosrow<sup>1,3</sup>, Cordova, Jaime A.<sup>4</sup>, Brusslan, Judy A.<sup>2</sup>

<sup>1</sup>These two authors (WEH and KK) contributed equally to this work

<sup>2</sup>Department of Biological Sciences, California State University, Long Beach

<sup>3</sup>Joint Genome Institute, DOE, Walnut Creek, CA

<sup>4</sup>Laboratory of Genetics, University of Wisconsin, Madison

Contributing Author: Judy A Brusslan [Judy.Brusslan@csulb.edu](mailto:Judy.Brusslan@csulb.edu)

Author email addresses: [willehinckley@gmail.com](mailto:willehinckley@gmail.com), [k.keymanesh@hotmail.com](mailto:k.keymanesh@hotmail.com), [cordova.a.jaime@gmail.com](mailto:cordova.a.jaime@gmail.com)

## 1 Abstract

2 Nutrient remobilization during leaf senescence nourishes the growing plant. Understanding the  
3 regulation of this process is essential for reducing our dependence on nitrogen fertilizers and increasing  
4 agricultural sustainability. Our lab is interested in chromatin changes that accompany the transition to  
5 leaf senescence. Previously, darker green leaves were reported for *Arabidopsis thaliana hac1* mutants,  
6 defective in a gene encoding a histone acetyltransferase in the CREB-binding protein family. Here, we  
7 show that two *Arabidopsis hac1* alleles display delayed age-related developmental senescence, but have  
8 normal dark-induced senescence. Using a combination of ChIP-seq for H3K9ac and RNA-seq for gene  
9 expression, we identified 44 potential HAC1 targets during age-related developmental senescence.  
10 Genetic analysis demonstrated that one of these potential targets, *ERF022*, is a positive regulator of leaf  
11 senescence. *ERF022* is regulated additively by HAC1 and MED25, suggesting MED25 recruits HAC1 to the  
12 *ERF022* promoter to increase its expression in older leaves.

13 Keywords: Leaf senescence, histone acetylation, HAC1, H3K9ac, ERF022, Mediator complex

14

## 15 Introduction

16 Plants continuously produce new organs. During vegetative growth, new leaves form from the shoot  
17 apical meristem, and develop into protein-rich photosynthetic factories that export sugars. Eventually,  
18 the older leaves enter senescence by catabolizing the photosynthetic apparatus and exporting nitrogen-  
19 rich amino acids to support continuing growth (Himelblau and Amasino, 2001). Understanding the  
20 regulation of leaf senescence could maximize nitrogen recycling thus producing more nutrient-rich  
21 seeds and reducing the need for fertilizers.

22 The transition into leaf senescence is preceded (Kim et al., 2018a) and accompanied by changes in gene  
23 expression (Buchanan-Wollaston et al., 2005; van der Graaff et al., 2006; Breeze et al., 2011). Lists of  
24 senescence-associated genes (SAG) have been generated from these transcriptome analyses. Enriched  
25 biological processes from Gene Ontology (GO) analyses include response to the hormones salicylic acid  
26 (SA), jasmonic acid (JA), abscisic acid (ABA) and ethylene. Also, enrichment of GO terms autophagy,  
27 immune response, defense response, and response to reactive oxygen species demonstrates a  
28 molecular relationship between defense and leaf senescence. Additional GO terms highly represented in  
29 SAGs from age-related developmental senescence include response to chitin and glucosinolate  
30 biosynthesis (Bruslan et al., 2015). The consistent enrichment of the phosphorylation term among SAG  
31 lists is likely a result of high expression of receptor-like kinase gene-family members, which also are  
32 known to regulate defense (Antolín-Llovera et al., 2014).

33 Changes in chromatin structure are hypothesized to promote and/or maintain leaf senescence  
34 (Humbeck, 2013). We have previously shown a correlation between histone 3, lysine 4, trimethylation  
35 (H3K4me3) and histone 3, lysine 9 acetylation (H3K9ac) histone modifications and increased expression  
36 of senescence up-regulated genes (SURGs). A similar correlation was seen between histone 3, lysine 27  
37 trimethylation (H3K27me3) marks and decreased expression of senescence down-regulated genes  
38 (SDRGs) (Bruslan et al., 2012; Bruslan et al., 2015). Genetic analysis suggests histone deacetylases  
39 regulate leaf senescence. HDA19 is a negative regulator of senescence (Tian and Chen, 2001) while  
40 HDA6 is a positive regulator of leaf senescence (Wu et al., 2008). HDA9 works with POWERDRESS to

41 reduce the expression of four putative negative regulators of leaf senescence (*NPX1*, *TMAC2*, *WRKY57*  
42 and *APG9*), thus promoting leaf senescence (Chen et al., 2016).

43 Recently, two studies linked chromatin changes to leaf senescence. The Polycomb Repressive Complex 2  
44 (PRC2) catalyzes H3K27me3 for long-term repression of ABA-induced SAGs (Liu et al., 2018). Double  
45 mutants in two PRC2 subunits (*clf/swn*) retain high SAG expression even after these genes are repressed  
46 in WT. H3K27me3-target genes that continue to be expressed in *clf/swn* mutants are significantly  
47 enriched for leaf senescence-related GO terms, indicating that long-term dampening of SAG expression  
48 is mediated by the H3K27me3 repressive mark. In the second study, the Jmj16 H3K4me3 demethylase  
49 acts to keep SAGs repressed in younger leaves (Liu et al., 2019). In *jmj16* mutant alleles, both *WRKY53*  
50 and *SAG201* were up-regulated and associated with higher levels of the H3K4me3 mark. Non-catalytic  
51 forms of JMJ16 could bind to the promoter region, but only catalytically active forms could repress  
52 *WRKY53* gene expression. This second study demonstrated that changes in H3K4me3 marks can regulate  
53 SAGs.

54 *hac1* mutant alleles were reported to have darker green leaves (Li et al., 2014a). *HAC1* encodes a  
55 histone acetyl transferase from the CREB Binding Protein family (Bordoli et al., 2001; Pandey et al.,  
56 2001), which is known to acetylate histone H3 resulting in H3K9ac (Earley et al., 2007; An et al., 2017).  
57 H3K9ac is associated with open chromatin and increased gene expression, and genes directly regulated  
58 by *HAC1* are expected to be down-regulated in *hac1* mutants. *hac1* mutants are pleiotropic and display a  
59 protruding gynoecium (Han et al., 2007). *HAC1* also regulates flowering, and *hac1* mutants flower late  
60 due to increased *Flowering Locus C (FLC)* expression (Deng et al., 2007). *FLC* inhibits flowering, however  
61 decreased expression of genes that negatively regulate *FLC* was not observed in *hac1* mutants. *HAC1*  
62 may have other non-histone targets or an unknown negative regulator of *FLC* could be down-regulated  
63 in late-flowering *hac1* mutants. In addition, *hac1/hac5* double mutant seedlings are hypersensitive to  
64 ethylene (Li et al., 2014b) and display the triple response (short root, short and thick hypocotyl and  
65 exaggerated apical hook) when grown in the dark in the absence of ACC, the non-gaseous precursor to  
66 ethylene. Neither single (*hac1* or *hac5*) mutant displayed ethylene hypersensitivity.

67 *HAC1* also plays a role in the response to jasmonoyl-isoleucine (JA-ile), the active form of JA. *HAC1*  
68 acetylates histones associated with *MYC2* target genes to promote their expression. The Mediator  
69 Complex subunit, *MED25* interacts with *MYC2* and directly binds to and recruits *HAC1* to target genes  
70 (An et al., 2017). Transcriptome data showed that genes induced by JA-ile were less responsive in a *hac1*  
71 mutant. In addition, genes co-regulated by JA-ile and *HAC1* were enriched for many defense-related  
72 biological process GO terms as well as leaf senescence.

73 Here we show that *hac1* mutants have delayed age-related developmental leaf senescence. Potential  
74 *HAC1* targets are identified by RNA-seq and ChIP-seq utilizing WT and two *hac1* alleles. T-DNA insertion  
75 mutants in three potential *HAC1* targets were tested for leaf senescence phenotypes, and an *erf022*  
76 mutant disrupting the expression of *ERF022* showed delayed senescence. These findings implicate this  
77 AP2/ERF transcription factor as a novel positive effector of leaf senescence regulated by histone  
78 acetylation co-mediated by *HAC1* and *MED25*.

79

80 **Materials and Methods**

81 Plant Growth Conditions: *Arabidopsis thaliana* Col-0 ecotype plants were grow in Sunshine<sup>®</sup> Mix #1  
82 Fafard<sup>®</sup>-1P RSi (Sungro Horticulture). The soil was treated with Gnatrol WDG (Valent Professional  
83 Products) (0.3 g/500 ml H<sub>2</sub>O) to inhibit the growth of fungus gnat larvae, and plants were sub-irrigated  
84 with Gro-Power 4-8-2 (Gro-Power, Inc.) (10 ml per gallon). Plants were grown in Percival AR66L2X  
85 growth chambers under a 20:4 light:dark diurnal cycle with a light intensity of 28 umoles photons m<sup>-2</sup>  
86 sec<sup>-1</sup>. The low light intensity prevents light stress in older leaves, which was evident as anthocyanin  
87 accumulation at higher light intensities. To compensate for the reduced light intensity, the day length  
88 was extended. Leaves were marked by tying threads around the petioles soon after emergence from the  
89 meristem. Flowering time was determined when plants had 1 cm inflorescences (bolts). Leaf #5 from  
90 three week old plants were used for dark-induced senescence, and floated on water in the dark for the  
91 indicated number of days.

92 Genotype analysis: Genomic DNA was isolated from two-three leaves using Plant DNAzol Reagent  
93 (ThermoFisher) following manufacturer's instructions. Pellets were dried at room temperature for at  
94 least two hours, and resuspended in 30 uL TE (10 mM Tris, pH 8.0, 1 mM EDTA) overnight at 4°C. One  
95 microliter of genomic DNA was used as a template in PCR reactions with primers listed in Supplemental  
96 Table 2. All standard PCR reactions were performed with a 57°C annealing temperature using *Taq*  
97 polymerase with Standard *Taq* Buffer (New England Biolabs).

98 Chlorophyll: One hole-punch was removed from each marked or detached leaf, and incubated in 800 µL  
99 N,N-dimethyl formamide (DMF) overnight in the dark. 200 µL of sample was placed in a quartz  
100 microplate (Molecular Devices) and readings were performed at 664 nm and 647 nm using a BioTek  
101 Synergy H1 plate reader. Absorbance readings were used to determine chlorophyll concentration (Porra  
102 et al., 1989). Chlorophyll was normalized to equal leaf area. For each genotype/condition, n =6.

103 Total Protein: One leaf hole-punch was ground in liquid nitrogen in a 1.5 ml microfuge tube using a blue  
104 plastic pestle. 100 µL 0.1 M NaOH was added and the sample was ground for another 30 sec (Jones et  
105 al., 1989). Samples were incubated at room temperature for 30 min, centrifuged at 14000 rpm for 5 min.  
106 The Bradford protein assay (Bio-Rad Protein Assay Dye Reagent) was used to determine protein  
107 concentration in each supernatant using a bovine serum albumin standard. For each  
108 genotype/condition, n = 6.

109 Percent Nitrogen: Elemental analysis for % nitrogen was done by Midwest Microlab, Indianapolis, IN.  
110 100 dried seeds from one individual plant were in each sample (n = 8 for each genotype).

111 Gene Expression: Total RNA was isolated from the Indicated leaves using Trizol reagent. 1000 ng of  
112 extracted RNA was used as a template for cDNA synthesis using MMLV-reverse transcriptase (New  
113 England Biolabs) and random hexamers to prime cDNA synthesis. The cDNA was diluted 16-fold and  
114 used as a template for real-time qPCR using either ABsolute QPCR Mix, SYBR Green, ROX (Thermo  
115 Scientific) or qPCRBIO SyGreen Blue Mix Hi-Rox (PCR Biosystems), in Step One Plus or Quant Studio 6  
116 Flex qPCR machines. All real-time qPCR reactions used a 61°C annealing temperature.

117 For chlorophyll, total protein, percent nitrogen and gene expression, significant differences were  
118 determined using a t-test.

119 RNA-seq: Indicated leaves were harvested and stored in liquid nitrogen. RNA was extracted and RNA-seq  
120 library production was performed using the breath adapter directional sequencing (BrAD-seq) method

121 (Townsend et al., 2015). Real-time qPCR using ACT2 primers was the initial quality test. Libraries were  
122 sequenced at the Genome High-Throughput Facility (GHTF) at University of California, Irvine (UCI).

123 ChIP-seq; Nuclei preparation and ChIP was performed as described previously (Bruslan et al., 2012).  
124 Libraries were produced and sequenced at the GHTF at UCI.

125 Bioinformatics: RNA-seq raw data reads were aligned to the Arabidopsis TAIR 10 genome using  
126 Rsubread (Liao et al., 2013), and subject to quality control of count data and differential expression  
127 using NOISeq (Tarazona et al., 2015). The values were FPKM normalized using Tmisc and HTSFilter  
128 removed genes with low expression levels (Rau et al., 2013). A threshold value of  $q = 0.8$  and a 2-fold  
129 change as the cut-off point was used to determine DEGs. ChIP-seq data were analyzed by MACS (Zhang  
130 et al., 2008) to find peaks of enrichment in comparison to input samples. MANorm (Shao et al., 2012)  
131 identified regions of differential histone modification. TopGO performed GO Biological Process  
132 enrichment and GAGE (Luo et al., 2009) performed pathway enrichment.

133

## 134 **Results and Discussion**

### 135 ***hac1* Mutants Show Delayed Senescence**

136 Two *Arabidopsis hac1* alleles [*hac1-1* (SALK\_080380) and *hac1-2* (SALK\_136314), Supplemental Figure 1]  
137 displayed darker green leaves when compared to WT. Age-related chlorophyll loss is shown in Figure 1A.  
138 At 28 days, total chlorophyll levels in leaf 7 were equal, but as the leaves aged, chlorophyll levels  
139 decreased faster in WT than the two *hac1* alleles. A significant difference in chlorophyll levels was  
140 detected between WT and both *hac1* alleles at day 48. The retention of chlorophyll was accompanied by  
141 reduced mRNA levels for genes associated with leaf senescence (Figure 1B). *AtNAP* encodes a positive  
142 regulator of leaf senescence associated with ABA synthesis (Liang et al., 2014; Yang et al., 2014). *NIT2*  
143 encodes a nitrilase that is highly expressed in leaf senescence, and contributes to auxin synthesis  
144 (Normanly et al., 2007) and glucosinolate catabolism (Vorwerk et al., 2001). *NYC1* encodes a chlorophyll  
145 *b* reductase required for light harvesting complex disassembly (Kusaba et al., 2007). The chlorophyll and  
146 gene expression data show that *hac1* alleles display delayed leaf senescence.

147 The reduction of total chlorophyll was also evaluated in detached leaves floated in water in the dark  
148 (dark-induced senescence), and no difference was noted between WT and the two *hac1* alleles (Figure  
149 1C). There are molecular differences in the signaling pathways between dark-induced and  
150 developmental senescence; most prominent is the role of SA in developmental, but not in dark-induced  
151 senescence (Buchanan-Wollaston et al., 2005; van der Graaff et al., 2006; Guo and Gan, 2012). Thus, it is  
152 possible that alterations in the signaling of developmental senescence do not necessarily accompany  
153 changes in dark-induced senescence. These results support a role for HAC1 as a promoter of age-  
154 related, developmental leaf senescence.

155 A trending increase in total leaf protein concentration accompanied the significant increase in  
156 chlorophyll levels in both *hac1* alleles (Figures 2A-B). However, the delayed senescence in the *hac1*  
157 alleles did not result in greater percentage of seed nitrogen (Figure 2C). Delayed senescence in wheat  
158 was reported to increase grain nitrogen concentration (Zhao et al., 2015), however the relationship  
159 between percentage of seed nitrogen and leaf senescence is complex (Chardon et al., 2014; Havé et al.,  
160 2017).

161

162 ***hac1* Mutants Display Altered Levels of Histone Modifications and Changes in Gene Expression During**  
163 **Leaf Senescence**

164 ChIP-seq was performed on the same tissue shown in Figure 2 to identify genes associated with a loss of  
165 H3K9ac and/or H3K4me3 histone modifications in both *hac1* alleles. HAC1 catalyzes H3K9 acetylation,  
166 and both H3K9ac and H3K4me3 are associated with active gene expression (Berr et al., 2011). As  
167 expected, H3K9ac significantly decreased at 968 loci and increased at only 555 loci in both *hac1* alleles.  
168 H3K4me3 modifications were similarly affected, with 548 loci showing a loss and only 33 loci showing a  
169 gain of H3K4me3 marks. RNA-seq was used to identify differentially expressed genes (DEGs) between  
170 WT and both *hac1* alleles. Accordingly, the number of up-regulated DEGs (12) was much smaller than  
171 the number of down-regulated DEGs (143) in both *hac1* alleles. These 143 down-regulated DEGs were  
172 subject to pathway enrichment analysis, and significant enrichment of glucosinolate biosynthesis, plant-  
173 pathogen interaction, as well as glutathione and ascorbic acid metabolism were revealed. These  
174 pathways are stress-related and their down-regulation in *hac1* likely slows the rate of leaf senescence.  
175 One GO term enriched in the up-regulated DEGs in both *hac1* alleles is ribosome biogenesis, which  
176 occurs during rapid protein synthesis, and would be important for anabolic growth, not catabolic  
177 senescence. Cytokinin action delays dark-induced senescence, in part, by maintaining the expression of  
178 genes associated with ribosome GO terms (Kim et al., 2018b).

179 The Venn diagram in Figure 3 shows the overlap of genes with reductions in H3K9ac and H3K4me3  
180 marks, as well as decreased expression in both *hac1* alleles. Our analysis identified 44 genes  
181 (Supplemental Table 2) with reductions in H3K9ac marks and gene expression. These potential HAC1  
182 targets have enriched GO terms including response to chitin and response to abiotic stimulus. These GO  
183 biological process terms have previously been associated with SAGs (Brusslan et al., 2015). Two of the  
184 potential HAC1 targets, *IGMT1* and *CYP81F2* (green highlight in Supplemental Table 2), encode indole  
185 glucosinolate biosynthetic enzymes, providing evidence that these secondary compounds are important  
186 during leaf senescence and potentially regulated via histone acetylation. We also observed significant  
187 reductions in H3K4me3 marks for these two genes in both *hac1* alleles, further bolstering the presence  
188 of chromatin changes.

189

190 **Analysis of Leaf Senescence Phenotypes in Potential HAC1 Targets**

191 We measured leaf senescence in T-DNA insertion lines disrupting three regulatory genes from the list of  
192 44 potential HAC1 targets (yellow highlights in Supplemental Table 2). These include *ERF022*, *MYB15*  
193 and *TMAC2*. Two of these genes: *ERF022* and *TMAC2* also show a reduction in H3K4me3 marks. *ERF022*  
194 and *MYB15* encode transcription factors while *TMAC2* plays a negative role in ABA response (Huang and  
195 Wu, 2007). Flowering time, *NIT2* gene expression, and chlorophyll levels were quantified in these  
196 mutants (Figure 4A-C). We also showed that full-length mRNAs spanning the T-DNA insertion were not  
197 produced in each mutant allele (Figure 4D). The only line to show a consistent and strong significant  
198 alteration in leaf senescence was *erf022*, with slightly later flowering (by about three days), and after  
199 44d of growth, reduced *NIT2* expression (approximately 8-fold) and increased chlorophyll. These  
200 phenotypes indicate a delay in leaf senescence and implicate *ERF022* as a positive regulator of leaf  
201 senescence.

202 Our results suggest that H3K9 acetylation mediated by HAC1 occurs at *ERF022* during leaf aging, and is  
203 accompanied by changes in H3K4me3 marks. Together, these two marks likely promote the expression  
204 of *ERF022*, a positive regulator of leaf senescence. *ERF022* is a member of the drought-responsive  
205 element-binding (DREB) subfamily of the AP2/ERF family (Nakano et al., 2006). Protoplast transfection  
206 experiments show *ERF022* to be a positive regulator of the RD29A promoter (Wehner et al., 2011),  
207 suggesting *ERF022* may mediate abiotic stress. Etiolated *erf022* mutant seedlings produce significantly  
208 more ethylene, suggesting that *ERF022* attenuates ethylene synthesis early in development (Nowak et  
209 al., 2015). *EIN2* encodes an essential component of the ethylene signaling pathway, and *ein2* mutants  
210 delay leaf senescence (Oh et al., 1997), thus increased ethylene production would be expected to  
211 accelerate senescence. If *ERF022* is acting similarly in seedlings and older leaves, increased ethylene  
212 would be expected to promote senescence, however a delay was observed in *erf022*. It is possible that  
213 *ERF022* plays different roles at different times in development. JA and a necrotrophic pathogen  
214 stimulated *ERF022* expression (Mcgrath et al., 2005), indicating *ERF022* plays a role in defense. Defense  
215 and senescence share many genes, as noted previously. Of interest, the ethylene hypersensitivity  
216 previously observed in *hac1/hac5* double mutant seedlings may be due to reduced expression of  
217 *ERF022*. *erf022* mutants overproduce ethylene, and mutations in *HAC1* and *HAC5* additively displayed a  
218 constitutive triple response.

219

## 220 **MEDIATOR25 works additively with HAC1 to regulate *ERF022* expression**

221 The MED25 subunit of the Mediator Complex can interact with HAC1. We obtained *med25* mutants and  
222 produced *hac1-1/med25* double mutants to evaluate genetic interaction. The longest delay in flowering  
223 was observed for *med25* and *hac1-1/med25* (Figure 5A), but an additive effect in flowering phenotype  
224 was not present. Chlorophyll levels were measured in leaf 7 in 45 day old plants, and higher chlorophyll  
225 levels were observed in *hac1-1*, *med25* and the *hac1-1/med25* double mutants, and although all lines  
226 were significantly greater than WT, none were significantly different from each other (Figure 5B). These  
227 data suggest that *HAC1* and *MED25* do not have an additive effect, as loss of one or both show similar  
228 delays in flowering and chlorophyll loss. The *erf022* mutant was also included in this experiment; it  
229 bolted later and had more chlorophyll than WT, but it did not differ from the *hac1-1*, *med25* or *hac1-1-*  
230 *1/med25* mutant lines.

231 Gene expression was also evaluated in these mutant lines. As expected, *ERF022* expression was  
232 minimally detected in the *erf022* mutant. A strong additive effect was seen between *hac1-1* and *med25*  
233 with much lower *ERF022* expression in the *hac1-1/med25* double mutant than in either single mutant  
234 (Figure 5C). These data suggest that *MED25* guides *HAC1* to histones at the *ERF022* locus to direct  
235 histone acetylation for increased chromatin accessibility. With respect to two other SAGs, *NIT2* and  
236 *Lhcb2.4*, the *erf022* mutant showed the largest effect: minimal up-regulation of *NIT2* (Figure 5D) and  
237 minimal down-regulation of *Lhcb2.4* (Figure 5E) as compared to *hac1-1*, *med25* and *hac1-1/med25*.  
238 These data suggest that loss of *ERF022* has a more profound effect on the leaf senescence phenotype  
239 than its down-regulation through loss of both *HAC1* and *MED25*. Although the *ERF022* transcript levels  
240 were similar to the *hac1-1/med25* double mutant (Figure 5C), it is probable that the mRNA produced in  
241 the *erf022* mutant is inefficiently translated due to the T-DNA insertion in the 3'-UTR and led to a  
242 stronger phenotype in *erf022*. In addition, there are likely more genes mis-regulated in *hac1-1/med25*  
243 and these may have compensating effects on leaf senescence.

244

245 **Conclusion**

246 *hac1* mutant alleles display a delay in leaf senescence implicating histone acetylation as a contributor to  
247 the regulation of leaf senescence. A combined approach using ChIP-seq, RNA-seq and genetic analysis,  
248 identified ERF022 as a novel positive effector of leaf senescence regulated by H3K9ac and H3K4me3  
249 marks. *ERF022* is possibly a direct target of HAC1, which operates in concert with MED25 to allow full  
250 expression of *ERF022* in older leaves.

251

252

253



254 **Literature Cited**

- 255 **An C, Li L, Zhai Q, You Y, Deng L, Wu F, Chen R, Jiang H, Wang H, Chen Q, et al** (2017) Mediator subunit  
256 MED25 links the jasmonate receptor to transcriptionally active chromatin. *Proc Natl Acad Sci* **114**:  
257 E893--E8939
- 258 **Antolín-Llovera M, Petutsching EK, Ried MK, Lipka V, Nürnberger T, Robatzek S, Parniske M** (2014)  
259 Knowing your friends and foes - plant receptor-like kinases as initiators of symbiosis or defence.  
260 *New Phytol* **204**: 791–802
- 261 **Berr A, Shafiq S, Shen WH** (2011) Histone modifications in transcriptional activation during plant  
262 development. *Biochim Biophys Acta - Gene Regul Mech* **1809**: 567–576
- 263 **Bordoli L, Netsch M, Luthi U, Lutz W, Eckner R** (2001) Plant orthologs of p300/CBP: conservation of a  
264 core domain in metazoan p300/CBP acetyltransferase-related proteins. *Nucleic Acids Res* **29**: 589–  
265 597
- 266 **Breeze E, Harrison E, McHattie S, Hughes L, Hickman R, Hill C, Kiddle S, Kim Y -s., Penfold CA, Jenkins  
267 D, et al** (2011) High-Resolution Temporal Profiling of Transcripts during Arabidopsis Leaf  
268 Senescence Reveals a Distinct Chronology of Processes and Regulation. *Plant Cell* **23**: 873–894
- 269 **Brusslan JA, Bonora G, Rus-Canterbury AM, Jaroszewicz A, Tariq F, Pellegrini M** (2015a) A Genome-  
270 Wide Chronological Study of Gene Expression and Two Histone Modifications, H3K4me3 and  
271 H3K9ac, during Developmental Leaf Senescence. *Plant Physiol* **168**: 1246–1261
- 272 **Brusslan JA, Bonora G, Rus-Canterbury AM, Tariq F, Jaroszewicz A, Pellegrini M** (2015b) A Genome-  
273 Wide Chronological Study of Gene Expression and Two Histone Modifications, H3K4me3 and  
274 H3K9ac, during Developmental Leaf Senescence. *Plant Physiol* **168**: 1246–1261
- 275 **Brusslan JA, Rus Alvarez-Canterbury AM, Nair NU, Rice JC, Hitchler MJ, Pellegrini M** (2012) Genome-  
276 wide evaluation of histone methylation changes associated with leaf senescence in Arabidopsis.  
277 *PLoS One* **7**: e33151
- 278 **Buchanan-Wollaston V, Page T, Harrison E, Breeze E, Pyung OL, Hong GN, Lin JF, Wu SH, Swidzinski J,  
279 Ishizaki K, et al** (2005) Comparative transcriptome analysis reveals significant differences in gene  
280 expression and signalling pathways between developmental and dark/starvation-induced  
281 senescence in Arabidopsis. *Plant J* **42**: 567–585
- 282 **Chardon F, Jasinski S, Durandet M, Lécureuil A, Soulay F, Bedu M, Guerche P, Masclaux-Daubresse C**  
283 (2014) QTL meta-analysis in Arabidopsis reveals an interaction between leaf senescence and  
284 resource allocation to seeds. *J Exp Bot* **14**: 3949–3962
- 285 **Chen X, Lu L, Mayer KS, Scalf M, Qian S, Lomax A, Smith LM, Zhong X** (2016) POWERDRESS interacts  
286 with HISTONE DEACETYLASE 9 to promote aging in Arabidopsis. *Elife* **5**: e17214
- 287 **Deng W, Liu C, Pei Y, Deng X, Niu L, Cao X** (2007) Involvement of the Histone Acetyltransferase AtHAC1  
288 in the Regulation of Flowering Time via Repression of FLOWERING LOCUS C in Arabidopsis. *Plant*  
289 *Physiol* **143**: 1660–1668
- 290 **Earley KW, Shook MS, Brower-Toland B, Hicks L, Pikaard CS** (2007) In vitro specificities of Arabidopsis  
291 co-activator histone acetyltransferases: Implications for histone hyperacetylation in gene  
292 activation. *Plant J* **52**: 615–626

- 293 **van der Graaff E, Schwacke R, Schneider A, Desimone M, Flugge U-I, Kunze R** (2006) Transcription  
294 Analysis of Arabidopsis Membrane Transporters and Hormone Pathways during Developmental  
295 and Induced Leaf Senescence. *PLANT Physiol* **141**: 776–792
- 296 **Guo Y, Gan SS** (2012) Convergence and divergence in gene expression profiles induced by leaf  
297 senescence and 27 senescence-promoting hormonal, pathological and environmental stress  
298 treatments. *Plant, Cell Environ* **35**: 644–655
- 299 **Han SK, Song JD, Noh YS, Noh B** (2007) Role of plant CBP/p300-like genes in the regulation of flowering  
300 time. *Plant J* **49**: 103–114
- 301 **Havé M, Marmagne A, Chardon F, Masclaux-Daubresse C** (2017) Nitrogen remobilization during leaf  
302 senescence: Lessons from Arabidopsis to crops. *J Exp Bot* **68**: 2513–2529
- 303 **Himelblau E, Amasino RM** (2001) Nutrients mobilized from leaves of Arabidopsis thaliana during leaf  
304 senescence. *J Plant Physiol* **158**: 1317–1323
- 305 **Huang M Der, Wu WL** (2007) Overexpression of TMAC2, a novel negative regulator of abscisic acid and  
306 salinity responses, has pleiotropic effects in Arabidopsis thaliana. *Plant Mol Biol* **63**: 557–569
- 307 **Humbeck K** (2013) Epigenetic and small RNA regulation of senescence. *Plant Mol Biol* **82**: 529–537
- 308 **Jones CG, Hare DJ, Compton SJ** (1989) Measuring plant protein with the Bradford Assay 1. Evaluation  
309 and Standard Method. *J Chem Ecol* **15**: 979–992
- 310 **Kim HJ, Park J-H, Kim J, Kim JJ, Hong S, Kim J, Kim JH, Woo HR, Hyeon C, Lim PO, et al** (2018a) Time-  
311 evolving genetic networks reveal a NAC troika that negatively regulates leaf senescence in  
312 Arabidopsis. *Proc Natl Acad Sci* **115**: E4390–E4939
- 313 **Kim J, Park SJ, Lee IH, Chu H, Penfold CA, Kim JH, Buchanan-Wollaston V, Nam HG, Woo HR, Lim PO**  
314 (2018b) Comparative transcriptome analysis in Arabidopsis ein2/ore3 and ahk3/ore12 mutants  
315 during dark-induced leaf senescence. *J Exp Bot* **69**: 3023–3036
- 316 **Kusaba M, Ito H, Morita R, Iida S, Sato Y, Fujimoto M, Kawasaki S, Tanaka R, Hirochika H, Nishimura**  
317 **M, et al** (2007) Rice NON-YELLOW COLORING1 Is Involved in Light-Harvesting Complex II and Grana  
318 Degradation during Leaf Senescence. *Plant Cell Online* **19**: 1362–1375
- 319 **Li C, Xu J, Li J, Li Q, Yang H** (2014a) Involvement of Arabidopsis HAC family genes in pleiotropic  
320 developmental processes. *Plant Signal Behav* **9**: 14–17
- 321 **Li C, Xu J, Li J, Li Q, Yang H** (2014b) Involvement of arabidopsis histone acetyltransferase HAC family  
322 genes in the ethylene signaling pathway. *Plant Cell Physiol* **55**: 426–435
- 323 **Liang C, Wang Y, Zhu Y, Tang J, Hu B, Liu L, Ou S, Wu H, Sun X, Chu J, et al** (2014) OsNAP connects  
324 abscisic acid and leaf senescence by fine-tuning abscisic acid biosynthesis and directly targeting  
325 senescence-associated genes in rice. *Proc Natl Acad Sci* **111**: 10013–10018
- 326 **Liao Y, Smyth GK, Shi W** (2013) The Subread aligner: Fast, accurate and scalable read mapping by seed-  
327 and-vote. *Nucleic Acids Res* **41**: e108
- 328 **Liu C, Cheng J, Zhuang Y, Ye L, Li Z, Wang Y, Qi M, Zhang Y** (2018) Polycomb repressive complex 2  
329 attenuates ABA-induced senescence in Arabidopsis. *Plant J* **97**: 368–377
- 330 **Liu P, Zhang S, Zhou B, Luo X, Zhou F** (2019) The Histone H3K4 Demethylase JM16 Represses Leaf

- 331 Senescence in Arabidopsis. *Plant Cell*. doi: 10.1105/tpc.18.00693
- 332 **Luo W, Friedman MS, Shedden K, Hankenson KD, Woolf PJ** (2009) GAGE: Generally applicable gene set  
333 enrichment for pathway analysis. *BMC Bioinformatics* **10**: 1–17
- 334 **Mcgrath KC, Dombrecht B, Manners JM, Schenk PM, Edgar CI, Udvardi MK, Kazan K, Maclean DJ, Plant**  
335 **T** (2005) Repressor- and Activator-Type Ethylene Response Factors Functioning in Jasmonate  
336 Signaling and Disease Resistance Identified via a Genome-Wide Screen of Arabidopsis Transcription  
337 Factor Gene Expression. *PLANT Physiol* **139**: 949–959
- 338 **Nakano T, Suzuki K, Fujimura T, Shinshi H, Yang G, Li Y, Zheng C** (2006) Genome-wide analysis of the  
339 ERF Gene Family in Arabidopsis and Rice. *Plant Physiol* **140**: 411–432
- 340 **Normanly J, Grisafi P, Fink GR, Bartel B** (2007) Arabidopsis Mutants Resistant to the Auxin Effects of  
341 Indole-3-Acetonitrile Are Defective in the Nitrilase Encoded by the NIT1 Gene. *Plant Cell* **9**: 1781–  
342 1790
- 343 **Oh SA, Park J-H, Lee GI, Paek KH, Park SK, Nam HG** (1997) Identification of three genetic loci controlling  
344 leaf senescence in Arabidopsis thaliana. *Plant J* **12**: 527–535
- 345 **Pandey R, Mu È Ller A, Napoli CA, Selinger DA, Pikaard CS, Richards EJ, Bender J, Mount DW,**  
346 **Jorgensen RA** (2001) Analysis of histone acetyltransferase and histone deacetylase families of  
347 Arabidopsis thaliana suggests functional diversi®cation of chromatin modi®cation among  
348 multicellular eukaryotes. *Nucleic Acids Res* **30**: 5036–5055
- 349 **Rau A, Gallopin M, Celeux G, Jaffrézic F** (2013) Data-based filtering for replicated high-throughput  
350 transcriptome sequencing experiments. *Bioinformatics* **29**: 2146–2152
- 351 **Shao Z, Zhang Y, Yuan GC, Orkin SH, Waxman DJ** (2012) MAnorm: A robust model for quantitative  
352 comparison of ChIP-Seq data sets. *Genome Biol* **13**: R16
- 353 **Tarazona S, Furió-Tarí P, Turrà D, Pietro A Di, Nueda MJ, Ferrer A, Conesa A** (2015) Data quality aware  
354 analysis of differential expression in RNA-seq with NOISeq R/Bioc package. *Nucleic Acids Res* **43**:  
355 e140
- 356 **Tian L, Chen JZ** (2001) Blocking histone deacetylation in Arabidopsis induces pleiotropic effects on plant  
357 gene regulation and development. *Proc Natl Acad Sci USA* **98**: 200–205
- 358 **Townsley BT, Covington MF, Ichihashi Y, Zumstein K, Sinha NR** (2015) BrAD-seq: Breath Adapter  
359 Directional sequencing: a streamlined, ultra-simple and fast library preparation protocol for strand  
360 specific mRNA library construction. *Front Plant Sci* **6**: 366
- 361 **Vorwerk S, Biernacki S, Hillebrand H, Janzik I, Müller A, Weiler EW, Piotrowski M** (2001) Enzymatic  
362 characterization of the recombinant Arabidopsis thaliana nitrilase subfamily encoded by the  
363 NIT2/NIT1/NIT3-gene cluster. *Planta* **212**: 508–516
- 364 **Wehner N, Hartmann L, Ehlert A, Böttner S, Oñate-Sánchez L, Dröge-Laser W** (2011) High-throughput  
365 protoplast transactivation (PTA) system for the analysis of Arabidopsis transcription factor  
366 function. *Plant J* **68**: 560–569
- 367 **Wu K, Zhang L, Zhou C, Yu CW, Chaikam V** (2008) HDA6 is required for jasmonate response, senescence  
368 and flowering in Arabidopsis. *J Exp Bot* **59**: 225–234
- 369 **Yang J, Worley E, Udvardi M** (2014) A NAP-AAO3 Regulatory Module Promotes Chlorophyll Degradation

- 370 via ABA Biosynthesis in Arabidopsis Leaves. *Plant Cell Online* **26**: 4862–4874
- 371 **Zhang Y, Liu T, Meyer CA, Eeckhoutte J, Johnson DS, Bernstein BE, Nussbaum C, Myers RM, Brown M, Li**  
372 **W, et al** (2008) Model-based Analysis of ChIP-Seq (MACS). *Genome Biol* **9**: R137
- 373 **Zhao D, Derkx AP, Liu DC, Buchner P, Hawkesford MJ** (2015) Overexpression of a NAC transcription  
374 factor delays leaf senescence and increases grain nitrogen concentration in wheat. *Plant Biol* **17**:  
375 904–913
- 376

377 **Figure Legends**

378 **Figure 1.** Delayed age-related senescence in *hac1* alleles. A) To observe age-related developmental  
379 senescence, total chlorophyll was measured from leaf 7 from plants that had grown 28, 38 or 48 days.  
380 Significant differences from WT are indicated by asterisks (t-test,  $p < 0.05$ ) and were observed for both  
381 *hac1* alleles at 48 days. B) RNA was extracted from WT and the *hac1-1* allele at 48 days from leaf 6 of the  
382 same plants shown in panel A, and gene expression for three SAGs was measured by real-time qPCR. C)  
383 Leaf 5 was removed from plants grown for 21 days, and floated on water in the dark for the indicated  
384 number of days to observe dark-induced senescence. One leaf disc was removed from each leaf and  
385 chlorophyll was measured. No significant differences were observed. All error bars show the 95%  
386 confidence interval.

387 **Figure 2.** Chlorophyll, protein and seed nitrogen content in *hac1* alleles. Plants were grown for 49 days  
388 and chlorophyll (A) and total protein (B) were measured in hole-punch disks from leaves 12-14,  $n = 8$ .  
389 Significant differences between WT were observed for chlorophyll, but not total protein (t-test,  $p <$   
390  $0.05$ ). Seeds were harvested from individual plants and batches of 100 dried seeds were subject to  
391 elemental analysis (C). No significant differences in percent nitrogen were observed,  $n = 8$ . All error bars  
392 show the 95% confidence interval.

393 **Figure 3:** The Venn diagram shows the overlap of genes with reductions in gene expression and histone  
394 modifications. WT, *hac1-1* and *hac1-2* (49 days, leaf 12-14) were subject to RNA-seq and ChIP-seq using  
395 H3K9ac and H3K3me3 antibodies. Genes that showed a significant reduction in both *hac1* alleles in  
396 comparison to WT were considered to have lower expression (RNA-seq) or reduced histone marks (ChIP-  
397 seq).

398 **Figure 4:** Senescence phenotypes in T-DNA insertion lines disrupting potential HAC1 target genes. Panel  
399 A shows flowering time and error bars show the standard deviation of two separate trials. Panel B shows  
400 *NIT2* gene expression and panel C shows total chlorophyll ( $n = 6$  for all genotypes). One biological  
401 replicate is shown, however similar results were obtained in a second biological replicate. Error bars for  
402 panels B and C show the 95% confidence interval. A t-test was used to evaluate significant differences: \*  
403 =  $p < 0.05$ , \*\* =  $p < 0.01$ , \*\*\* =  $p < 0.001$ . Gene expression is measured as  $40 - \Delta Ct$ . The  $\Delta Ct$  value is the Ct  
404 value of ACT2 – the Ct value of the gene of interest. Panel D shows that full-length mRNAs were not  
405 produced in T-DNA insertion alleles. The cDNAs templates are shown above the PCR products and the  
406 primers are shown below. Primer sequences are available in Supplemental Table 1.

407 **Figure 5:** Senescence phenotypes in *hac1-1/med25* double mutants. All lines were evaluated for  
408 flowering time (panel A). At 45 days of growth, chlorophyll was measured in leaf 7 and RNA was  
409 extracted from leaf 6. Total chlorophyll levels ( $\mu\text{g}$  per leaf disk) are shown in panel B. *ERF022* (panel C),  
410 *NIT2* (panel D) and *Lhcb2.4* (panel E) mRNA levels are shown. A t-test was used to evaluate significant  
411 differences: \* =  $p < 0.05$ , \*\* =  $p < 0.01$ , \*\*\* =  $p < 0.001$ . All error bars show the 95% confidence interval,  $n = 6$   
412 for all genotypes.)

413

414 **Acknowledgements:** The authors thank Soumi Barman and Glenn Nurwano for technical help in  
415 genotype analysis. Research reported in this publication was supported by the National Institute of  
416 General Medical Sciences of the National Institutes of Health under Award Numbers R25GM071638 and  
417 SC3GM113810. The content is solely the responsibility of the authors and does not necessarily represent  
418 the official views of the National Institutes of Health.

419

420 **Author Contributions:** WEH and KK designed and performed the research and analyzed data. JAC  
421 performed the research. JAB designed and performed the research, analyzed data and wrote the paper.  
422 All authors greatly contributed to editing.

423

#### 424 **Supplemental Data files**

425 Supplemental Figure 1: Full-length mRNAs are not produced in *hac1* alleles.

426 Supplemental Table 1: Primers

427 Supplemental Table 2: Genes with decreased H3K9ac and mRNA in both *hac1* alleles

428 RNA-seq and CHIP-seq data files are in the process of being added to the NCBI GEO database.

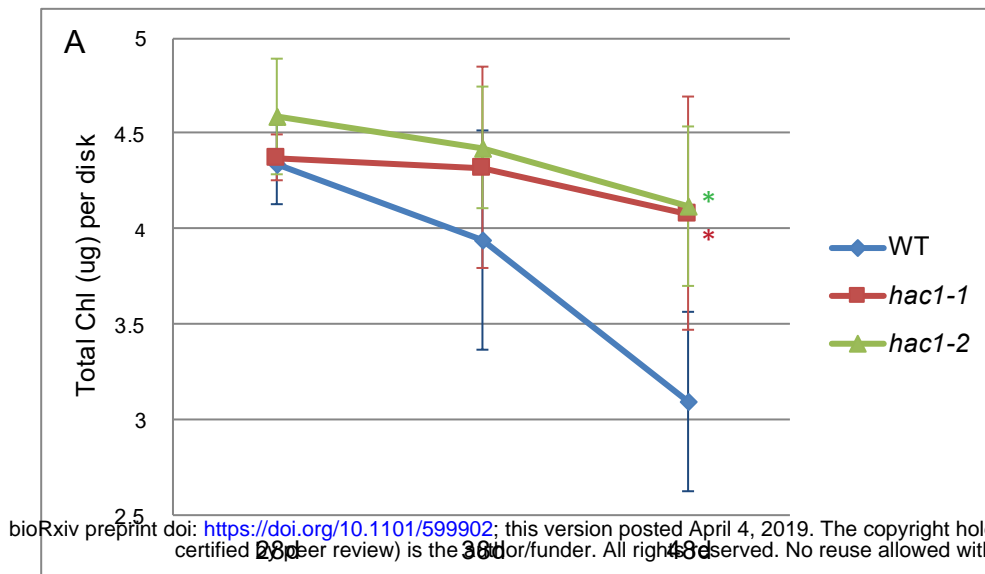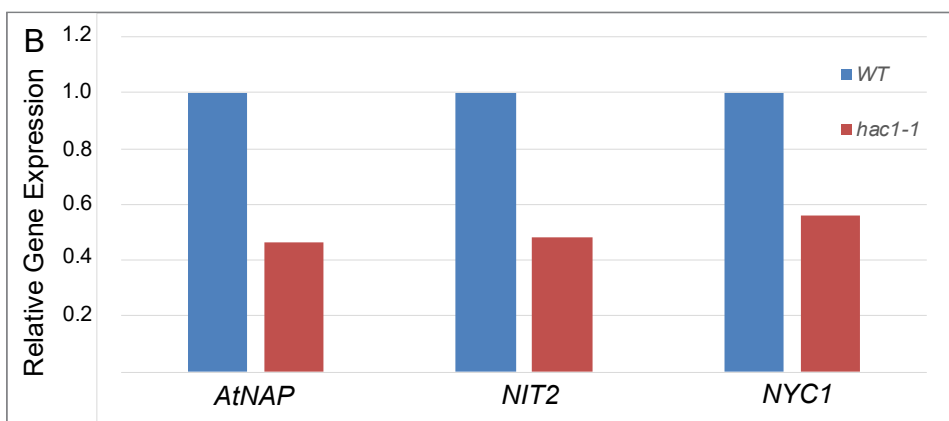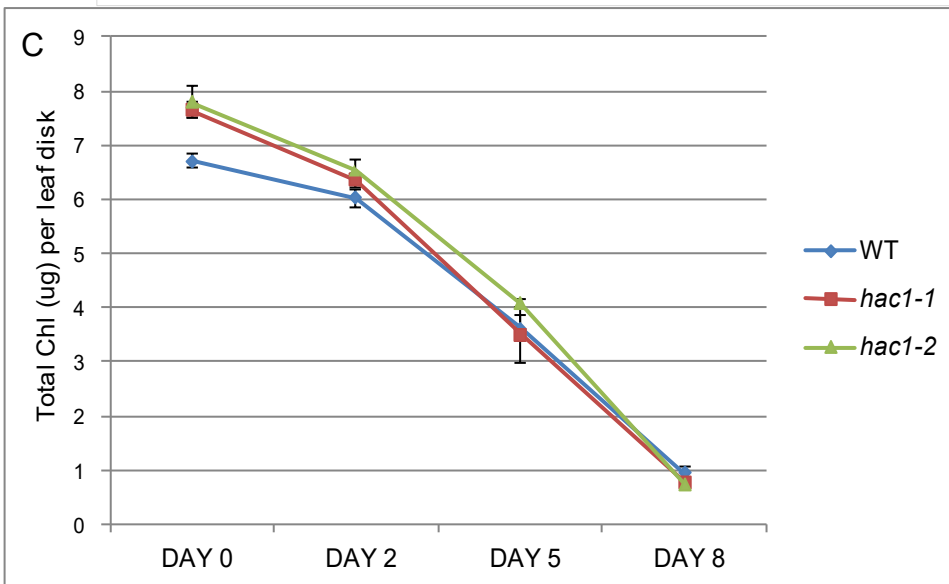

**Figure 1.** Delayed age-related senescence in *hac1* alleles. A) To observe age-related developmental senescence, total chlorophyll was measured from leaf 7 from plants that had grown 28, 38 or 48 days. Significant differences from WT are indicated by asterisks (t-test,  $p < 0.05$ ) and were observed for both *hac1* alleles at 48 days. B) RNA was extracted from WT and the *hac1-1* allele at 48 days from leaf 6 of the same plants shown in panel A, and gene expression for three SAGs was measured by real-time qPCR. C) Leaf 5 was removed from plants grown for 21 days, and floated on water in the dark for the indicated number of days to observe dark-induced senescence. One leaf disc was removed from each leaf and chlorophyll was measured. No significant differences were observed. All error bars show the 95% confidence interval.

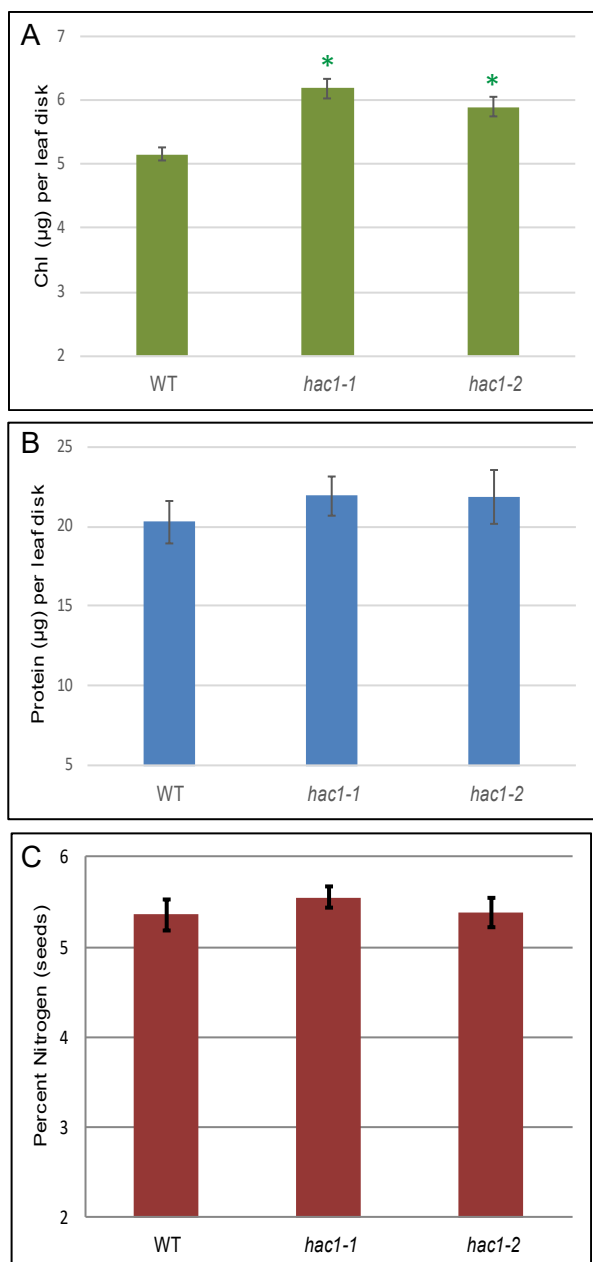

**Figure 2.** Chlorophyll, protein and seed nitrogen content in *hac1* alleles. Plants were grown for 49 days and chlorophyll (A) and total protein (B) were measured in hole-punch disks from leaves 12-14,  $n = 8$ . Significant differences between WT were observed for chlorophyll, but not total protein (t-test,  $p < 0.05$ ). Seeds were harvested from individual plants and batches of 100 dried seeds were subject to elemental analysis (C). No significant differences in percent nitrogen were observed,  $n = 8$ . All error bars show the 95% confidence interval.



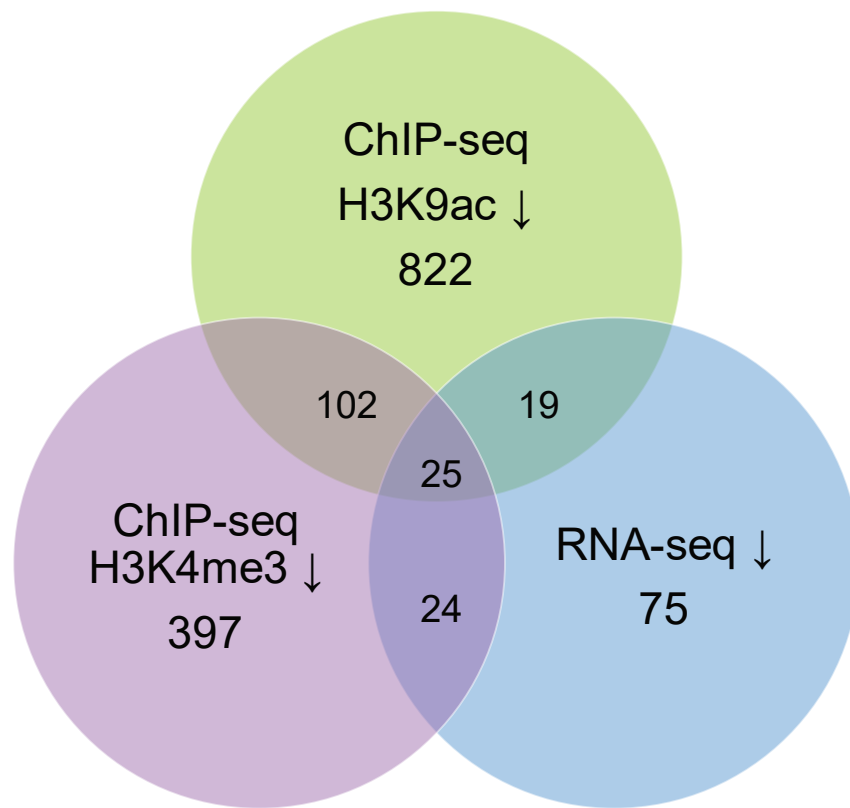

**Figure 3:** The Venn diagram shows the overlap of genes with reductions in gene expression and histone modifications. WT, *hac1-1* and *hac1-2* (49 days, leaf 12-14) were subject to RNA-seq and ChIP-seq using H3K9ac and H3K3me3 antibodies. Genes that showed a significant reduction in both *hac1* alleles in comparison to WT were considered to have lower expression (RNA-seq) or reduced histone marks (ChIP-seq).

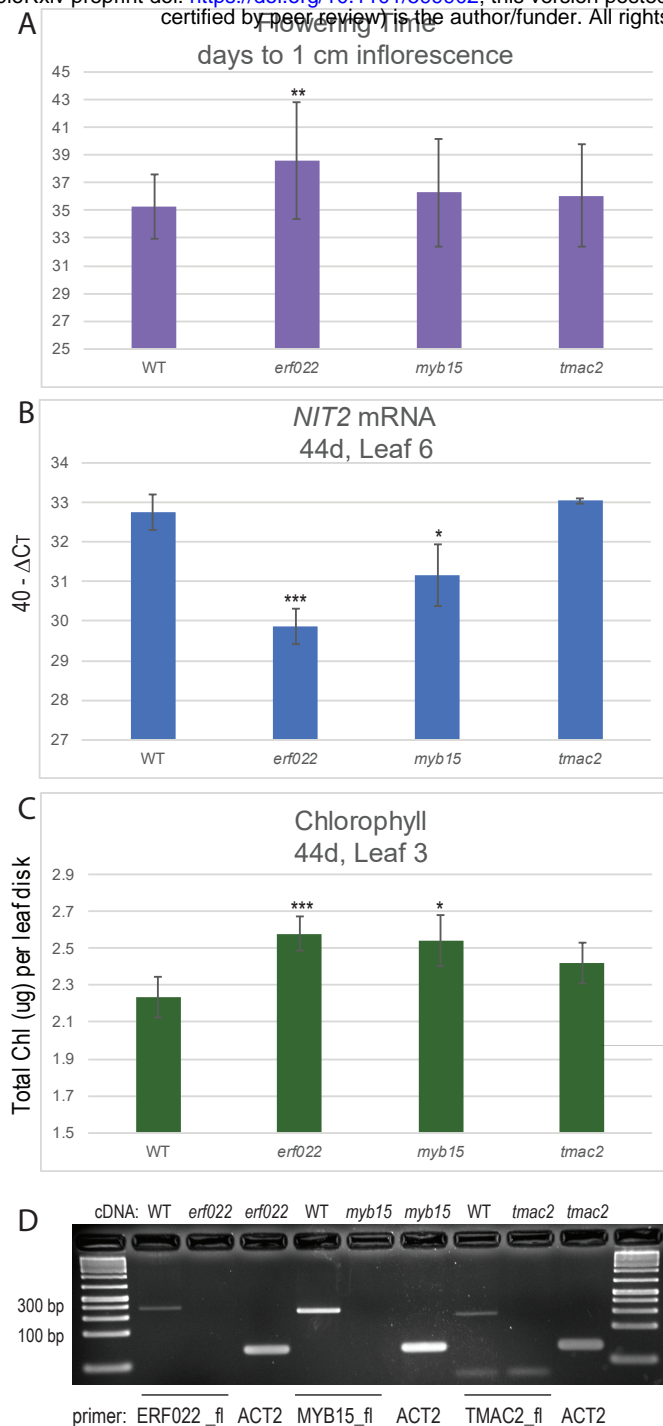

**Figure 4:** Senescence phenotypes in T-DNA insertion lines disrupting potential HAC1 target genes. Panel A shows flowering time and error bars show the standard deviation of two separate trials. Panel B shows *NIT2* gene expression and panel C shows total chlorophyll (n =6 for all genotypes). One biological replicate is shown, however similar results were obtained in a second biological replicate. Error bars for panels B and C show the 95% confidence interval. A t-test was used to evaluate significant differences: \* =  $p < 0.05$ , \*\* =  $p < 0.01$ , \*\*\* =  $p < 0.001$ . Gene expression is measured as  $40 - \Delta Ct$ . The  $\Delta Ct$  value is the Ct value of ACT2 – the Ct value of the gene of interest. Panel D shows that full-length mRNAs were not produced in T-DNA insertion alleles. The cDNAs templates are shown above the PCR products and the primers are shown below. Primer sequences are available in Supplemental Table 1

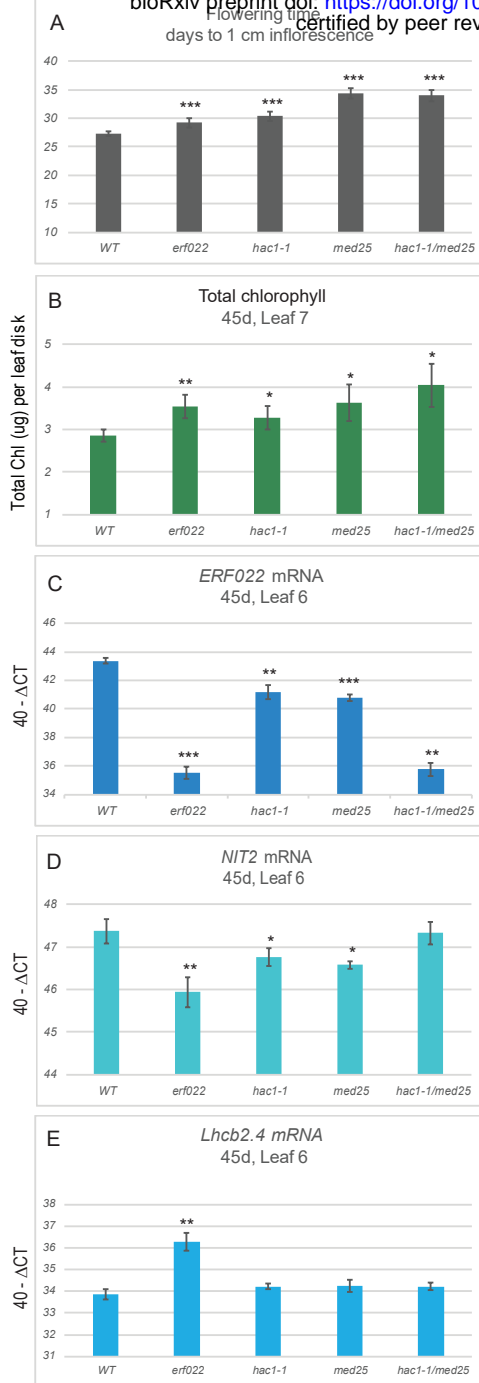

**Figure 5:** Senescence phenotypes in *hac1-1/med25* double mutants. All lines were evaluated for flowering time (panel A). At 45 days of growth, chlorophyll was measured in leaf 7 and RNA was extracted from leaf 6. Total chlorophyll levels ( $\mu\text{g}$  per leaf disk) are shown in panel B. *ERF022* (panel C), *NIT2* (panel D) and *Lhcb2.4* (panel E) mRNA levels are shown. A t-test was used to evaluate significant differences: \* =  $p < 0.05$ , \*\* =  $p < 0.01$ , \*\*\* =  $p < 0.001$ . All error bars show the 95% confidence interval,  $n=6$  for all genotypes.)
